# Supplementary material for: pH-Induced fragmentation of colloids based on responsive self-assembled copper(ii) metallopolymers
Source: Royal Society of Chemistry journal article supplement (doi:10.1039/c7nj05100j), 2018-01-01
Supplement: c7nj05100j1.pdf [file c7nj05100j1.pdf]

*New Journal of Chemistry*

## **Supporting Information**

### **pH-Induced Fragmentation of Colloids based on Responsive Self-Assembled Copper(II) Metallopolymers**

Bin Wang<sup>a</sup>, Margot Jacquet<sup>b</sup>, Kunzhou Wang<sup>a</sup>, Kun Xiong<sup>a</sup>, Minhao Yan<sup>a</sup>, Jérémie Courtois<sup>\*a</sup> and Guy Royal<sup>\*a,b</sup>

- a. State Key Laboratory Cultivation Base for Nonmetal Composites and Functional Materials, Southwest University of Science and Technology, Mianyang 621010, China.
- b. Université Grenoble Alpes, CNRS, Département de Chimie Moléculaire (UMR 5250), F38400 Grenoble, France.

\* Corresponding Authors: to whom correspondence should be addressed. E-mails: jeremiecourtois@swust.edu.cn ; guy.royal@univ-grenoble-alpes.fr

#### **Table of Contents**

|                                                                                                       |    |
|-------------------------------------------------------------------------------------------------------|----|
| - 1. Absorbance spectrum of $(LCu_2)_n$ polymer in methanol. ....                                     | 2  |
| - 2. Distribution in size of $(LCu_2)_n$ particles characterized by DLS .....                         | 3  |
| - 3. DLS and SLS analysis of $(LCu_2)_n$ particles .....                                              | 4  |
| - 4. Wide Angle X-ray Scattering (WAXS) of $(LCu_2)_n$ particles.....                                 | 5  |
| - 5. Electron Dispersive Spectroscopy (EDS) of $(LCu_2)_n$ particles .....                            | 6  |
| - 6. Kinetic of depolymerization of $(LCu_2)_n$ particles upon addition of HCl.....                   | 7  |
| - 7. Protonation using o-nitrobenzaldehyde (NBA) as photo-acid generator (PAG) .....                  | 8  |
| - 8. Depolymerization of $(LCu_2)_n$ particles triggered by photo-induced liberation of protons ..... | 9  |
| - 9. Depolymerization of $(LCu_2)_n$ particles triggered by addition of a competing chelator .....    | 11 |
| - 10. References.....                                                                                 | 13 |

- 1. Absorbance spectrum of  $(\text{LCu}_2)_n$  polymer in methanol.

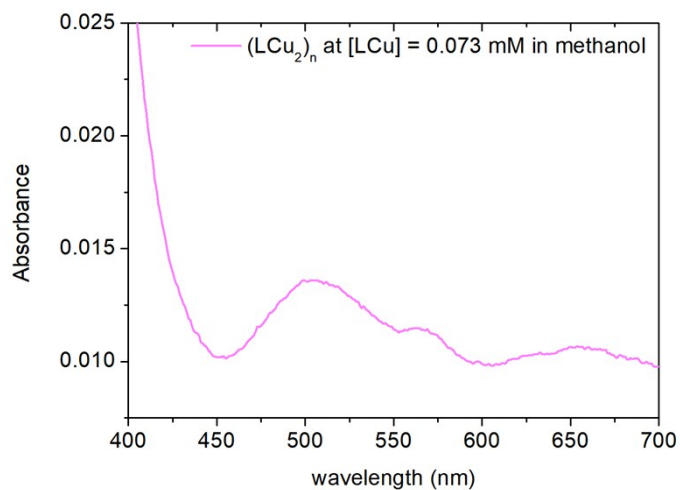

**Fig. S1.** Absorbance spectrum of  $(\text{LCu}_2)_n$  polymer at  $[\text{LCu}] = 0.073 \text{ mM}$  in methanol.

Fig. S1 shows the UV-vis absorbance spectrum of  $(\text{LCu}_2)_n$  polymer at  $[\text{LCu}] = 0.073 \text{ mM}$  in methanol. The absorbance peak at 510 nm is characteristic of the presence of dioxocyclam- $\text{Cu}^{2+}$  complex and gives a pink color to  $(\text{LCu}_2)_n$  polymer in solution. A secondary band is identified at 570 nm. Finally, a broad signal is present at 680 nm. The Absorbance spectrum is in good agreement with previous work.<sup>1</sup>

- 2. Distribution in size of  $(\text{LCu}_2)_n$  particles characterized by DLS

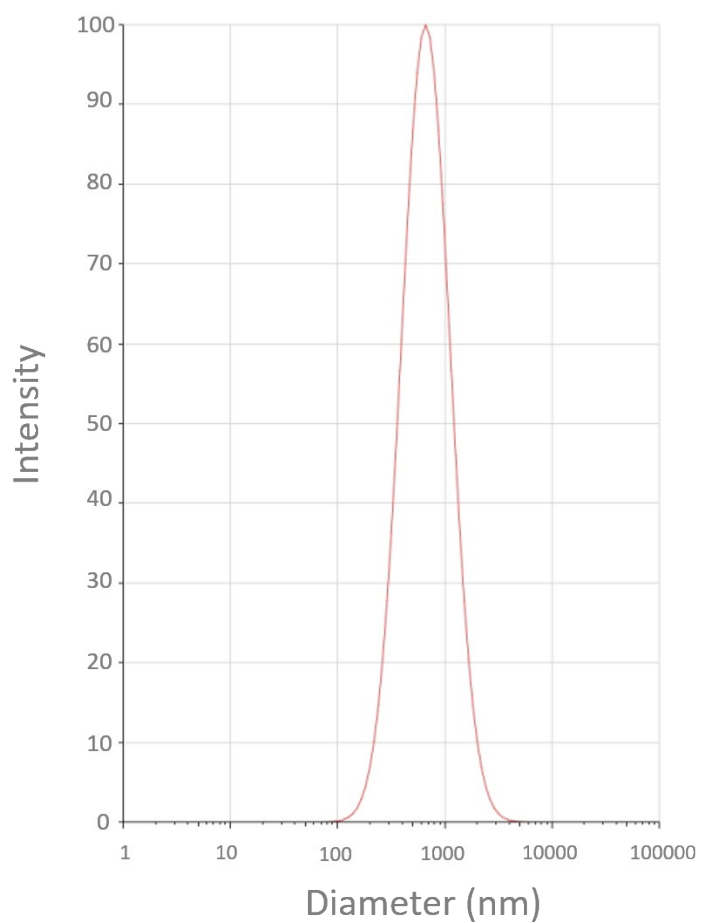

**Fig. S2.** Light scattered intensity as function of the diameter of  $(\text{LCu}_2)_n$  particles synthesized in 90/10 water / methanol mixture at  $[\text{LCu}_2] = 2 \mu\text{M}$ . Measurement was performed 16 h after synthesis. The average hydrodynamic diameter is  $D_H = 664 \text{ nm}$  and the polydispersity index is  $\text{PDI} = 0.307$ .

### - 3. DLS and SLS analysis of $(\text{LCu}_2)_n$ particles

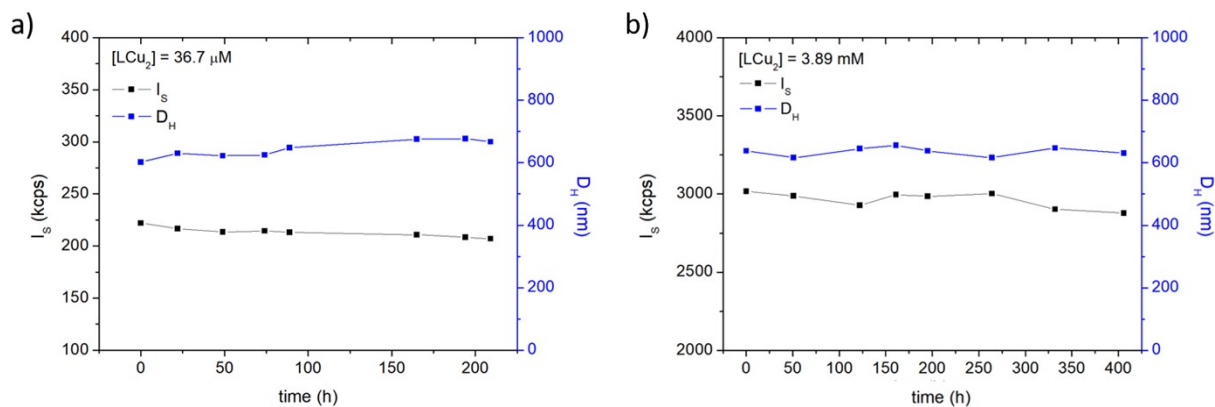

**Fig. S3** DLS and SLS analysis of  $(\text{LCu}_2)_n$  particles after concentration by evaporation under vacuum.  $D_H$  and  $I_s$  versus time of  $(\text{LCu}_2)_n$  particles at (a)  $[\text{LCu}_2] = 36.7 \mu\text{M}$ , and (b)  $[\text{LCu}_2] = 3.89 \text{ mM}$ . Particles were synthesized at  $[\text{LCu}_2] = 2 \mu\text{M}$  and then concentrated by evaporation under vacuum at  $60^\circ\text{C}$ .  $t = 0$  corresponds to the time when  $[\text{LCu}_2]$  was increased to respectively  $36.7 \mu\text{M}$  and  $3.89 \text{ mM}$ .

$(\text{LCu}_2)_n$  particles at  $[\text{LCu}_2] = 2 \mu\text{M}$  were synthesized in  $V_{\text{water}}/V_{\text{MeOH}} = 90/10$ . 10 hours after the transfer of the MeOH  $(\text{LCu}_2)_n$  solution into water ( $D_H((\text{LCu}_2)_n)$  at  $t = 10 \text{ h}) = 630 \pm 25 \text{ nm}$ ), the solvent was evaporated at  $T = 60^\circ\text{C}$  under reduced pressure until concentration became respectively  $[\text{LCu}_2] = 36.7 \mu\text{M}$  and  $3.89 \text{ mM}$ . Fig. S3 displays  $D_H$  and Scattered Intensity ( $I_s$ ) measurements as function of time of these dispersions at two concentrations.  $D_H$  before and after concentration process are similar, indicating that the particles did not aggregate. The colloidal stability of the dispersions is demonstrated by the constant values of both  $D_H$  and  $I_s$  over weeks.

#### - 4. Wide Angle X-ray Scattering (WAXS) of $(\text{LCu}_2)_n$ particles

$(\text{LCu}_2)_n$  particles at  $[\text{LCu}_2] = 2 \mu\text{M}$  were synthesized in  $V_{\text{water}}/V_{\text{MeOH}} = 90/10$ . 10 hours after the the transfer of MeOH  $(\text{LCu}_2)_n$  solution into water ( $D_{\text{H}}((\text{LCu}_2)_n \text{ at } t = 10 \text{ h}) = 630 \pm 25 \text{ nm}$ ), the solvent was evaporated at  $T = 60 \text{ }^\circ\text{C}$  under reduced pressure until concentration became respectively  $[\text{LCu}_2] = 36.7 \mu\text{M}$  and  $3.89 \text{ mM}$  corresponding to  $c_{(\text{LCu}_2)} = 0.36 \text{ wt}\%$ . 51 h after having being concentrated, the particles were characterized by a  $D_{\text{H}} = 617 \pm 25 \text{ nm}$  and a polydispersity  $\text{PDI} = 0.286$ , and were analyzed by WAXS.

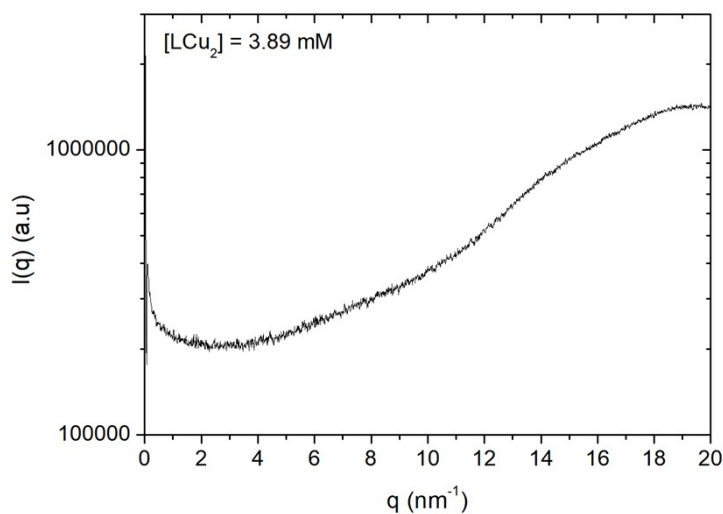

**Fig. S4.** WAXS pattern displaying  $I(q)$  versus  $q$  of  $(\text{LCu}_2)_n$  nanoparticles at  $[\text{LCu}_2] = 3.89 \text{ mM}$  ( $c_{(\text{LCu}_2)} = 0.36 \text{ wt}\%$ ).

Fig S4 displays the scattering pattern of an aqueous  $(\text{LCu}_2)_n$  particle dispersion at  $[\text{LCu}_2] = 3.89 \text{ mM}$ . The overall shape of the curve is attributed to the scattering of the solvent whereas no peaks which would be related to  $(\text{LCu}_2)_n$  particles themselves or to their microstructure are visible.

## - 5. Electron Dispersive Spectroscopy (EDS) of (LCu<sub>2</sub>)<sub>n</sub> particles

(LCu<sub>2</sub>)<sub>n</sub> nanoparticles were synthesized at [LCu<sub>2</sub>] = 2 μM and  $V_{water}/V_{MeOH} = 97.5/2.5$ . After 28 h of growth, the sample was dried on a Nickel grid and analyzed by EDS at 200 kV using magnification of 120520 x.

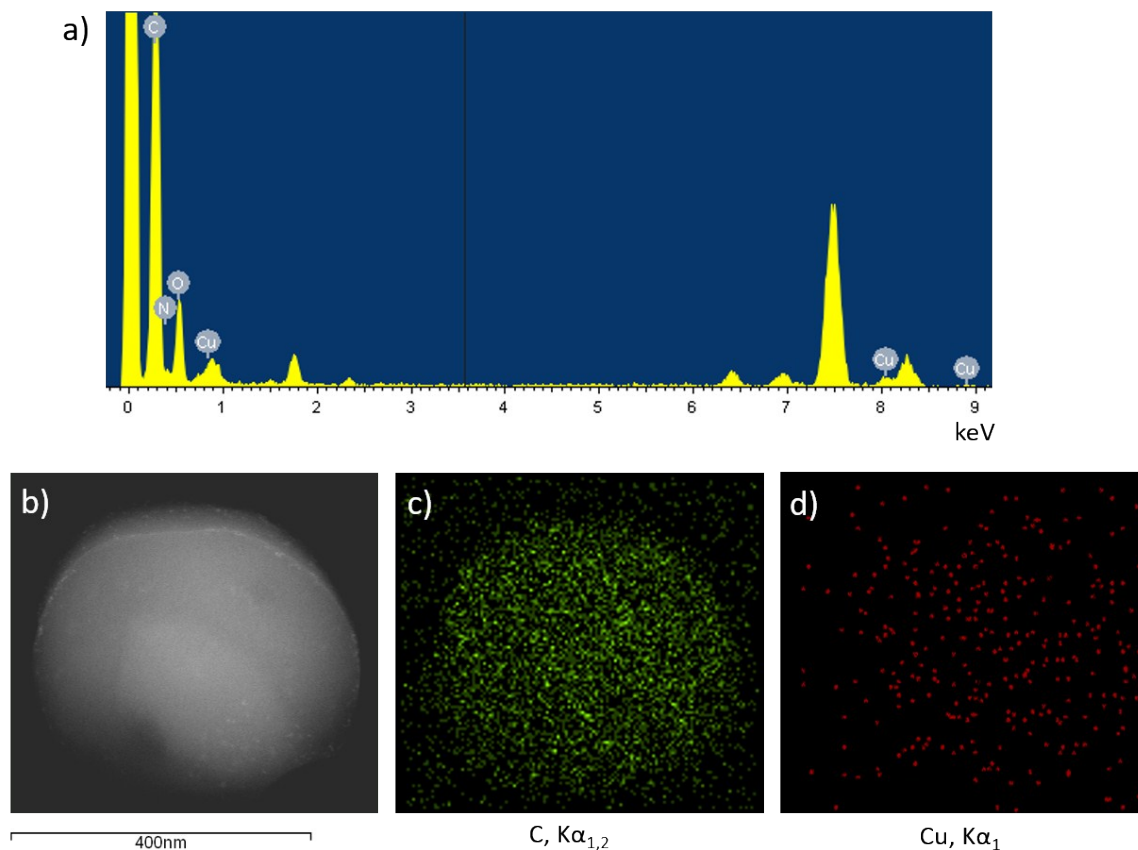

**Fig. S5. a)** EDS spectrum of the (LCu<sub>2</sub>)<sub>n</sub> particle pictured by TEM in “b”. The spectrum reveals the presence of C, O, N and Cu. **b)** TEM image of the area on which is performed EDS. The grey object is a (LCu<sub>2</sub>)<sub>n</sub> particle. **c)** Image obtained using energies corresponding to the Kα<sub>1,2</sub> rays of Carbon. C element appears in green. **d)** Image obtained using energy corresponding to the Kα<sub>1</sub> ray of Copper. Cu element appears in red.

Fig. S5.b is a TEM image of a (LCu<sub>2</sub>)<sub>n</sub> particle. The EDS survey spectrum presented in Fig. S5.a corresponds to the scanning of the area of the grid shown in Fig. S5.b. The peaks of the spectrum are interpreted as corresponding to Kα<sub>1,2</sub> of C at 0.28 keV, Kα<sub>1,2</sub> of N at 0.39 keV, Kα<sub>1,2</sub> of O at 0.52 keV and L<sub>1</sub> of Cu at 0.81 keV, Lα<sub>1,2</sub> of Cu at 0.930 keV, Kα<sub>1,2</sub> of Cu at 8.04 ± 0.01 keV, and Kβ<sub>1,3</sub> of Cu at 8.90 keV. Fig. S5.c and d are images of the scanned area highlighting the presence of C and Cu through the detection of energies corresponding to the Kα<sub>1,2</sub> of C and to the Kα<sub>1</sub> of Cu, respectively.

## - 6. Kinetic of depolymerization of $(\text{LCu}_2)_n$ particles upon addition of HCl

$(\text{LCu}_2)_n$  particles were synthesized in a 90/10 water/methanol mixture at  $[\text{LCu}_2] = 2 \mu\text{M}$ . After 46 h of growth, particles were concentrated to  $[\text{LCu}_2] = 36.7 \mu\text{M}$  by evaporation under reduced pressure at  $60^\circ\text{C}$ . Once concentrated, pH of the dispersion was 7 and  $D_H$  of the particles was  $675 \pm 25 \text{ nm}$ . 24 h after concentration, respectively 2.5, 100 and 1000 equivalents of HCl by  $\text{LCu}_2$  monomer unit were added to samples of  $(\text{LCu}_2)_n$  particles. Fig. S6.1 displays the Hydrodynamic diameters ( $D_H$ ) measured by DLS in function of time for the three samples. Fig. S6.2 presents the absorbance spectra of samples with 100 (S6.2.a) and 1000 (S6.2.b) equivalents of HCl over time.  $t = 0 \text{ h}$  corresponds to the time just before addition of HCl.

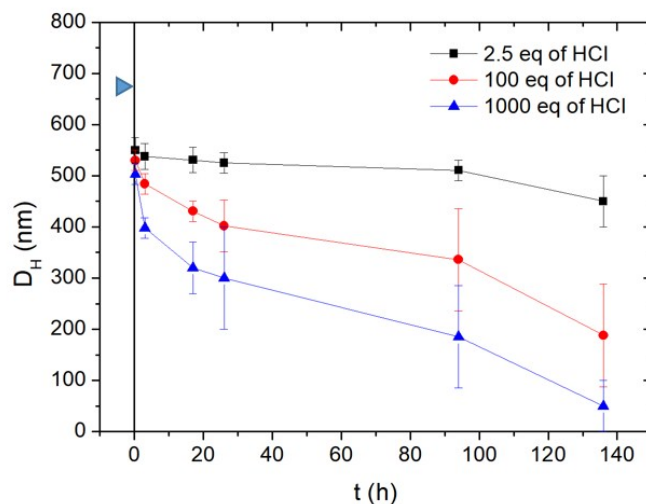

**Fig. S6.1** Evolution of hydrodynamic diameters ( $D_H$ ) measured by DLS as function of time for  $(\text{LCu}_2)_n$  particles at  $[\text{LCu}_2] = 36.7 \mu\text{M}$  upon addition of 2.5 (black), 100 (red) and 1000 (blue) equivalents of HCl by  $\text{LCu}_2$  monomer unit, respectively.  $t = 0$  corresponds to the time when HCl was injected into particles dispersions. The blue triangle indicates the  $D_H$  of the particles before introduction of HCl.

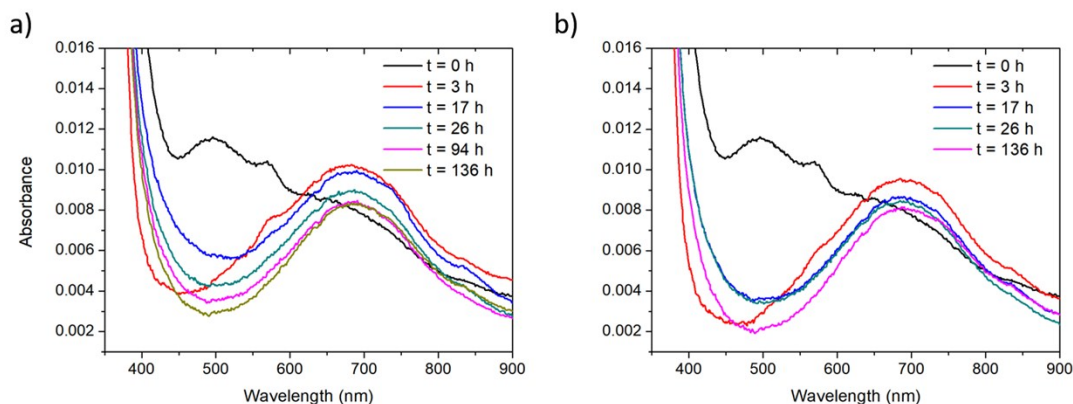

**Fig. S6.2** Evolution of the UV-vis absorbance spectra of  $(\text{LCu}_2)_n$  particles at  $[\text{LCu}_2] = 36.7 \mu\text{M}$  upon addition of 100 (a) and 1000 (b) equivalents of HCl by  $\text{LCu}_2$  monomer unit, as function of time.  $t = 0 \text{ h}$  corresponds to the time just before addition of acid. Peaks at 500 nm and 690 nm are characteristic of  $(\text{LCu}_2)_n$  polymer and  $\text{LH}_2\text{Cu}_2$  monomer, respectively.

- 7. Protonation using *o*-nitrobenzaldehyde (NBA) as photo-acid generator (PAG)

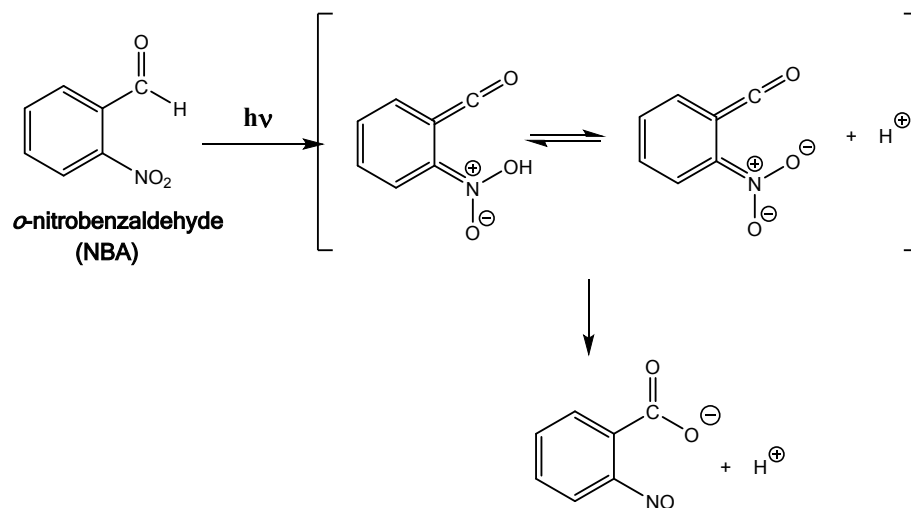

Fig. S7.1. Reactivity and  $\text{H}^+$  release during illumination of *o*-nitrobenzaldehyde.<sup>2-4</sup>

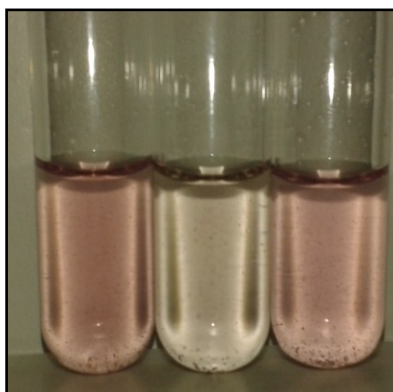

Fig. S7.2. Tests of photo-induced protons release in MeOH solutions of  $(\text{LCu}_2)_n$  polymer. Left:  $(\text{LCu}_2)_n$  alone upon illumination by UV light (365 nm). Center: after illumination (365 nm) in the presence of NBA. Right: in the presence of NBA without illumination. The fragmentation of the pink polymer to the dinuclear  $\text{Cu}^{2+}$  complex is observed only when the solution is irradiated in the presence of NBA.



## - 8. Depolymerization of $(\text{LCu}_2)_n$ particles triggered by photo-induced liberation of protons

The preparation of the particles used in these experiments is described in part 3.3 of the article. The photo-acid generator, *o*-nitrobenzaldehyde (NBA), and its proton-release mechanism are presented in section 7 of this document.

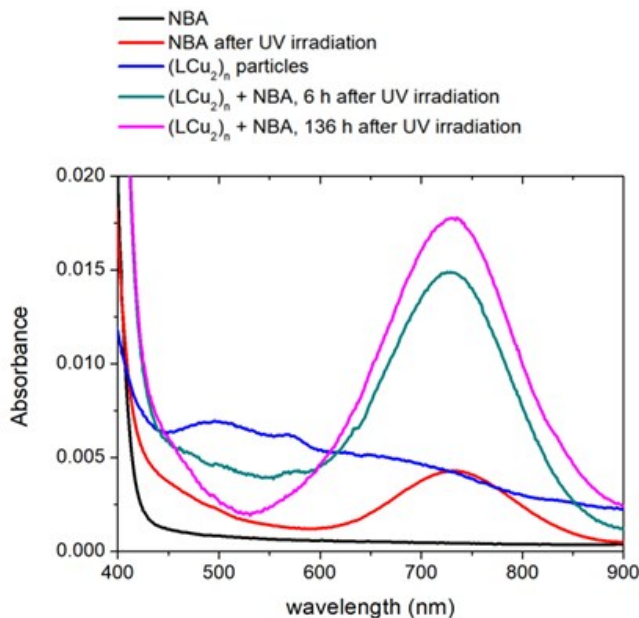

**Fig. S8.1** Absorbance spectra of: NBA aqueous solution (protected from light before measurement) at  $[\text{NBA}] = 1.1 \text{ mM}$  (black); NBA aqueous solution at  $[\text{NBA}] = 1.1 \text{ mM}$  which has been irradiated by UV light (365 nm) for 2h (red);  $(\text{LCu}_2)_n$  particles at  $[\text{LCu}_2] = 22 \text{ }\mu\text{M}$  (blue); mixture of  $(\text{LCu}_2)_n$  particles and NBA with  $[\text{LCu}_2] = 22 \text{ }\mu\text{M}$  and  $[\text{NBA}] = 1.1 \text{ mM}$  (50 equivalents of NBA by  $\text{LCu}_2$  monomer), irradiated by UV light for 2h, and measured 6 h (green) and 136 h (pink) after the end of irradiation.

**Note:** Once irradiated, NBA is transformed in new compounds having a strong and broad absorbance peak centered at 730 nm (Fig. S8.a, red curve). Therefore, supposedly released, the presence of  $\text{LH}_2\text{Cu}_2$  cannot be unambiguously evidenced by its characteristic absorbance peak centered at 690 nm.

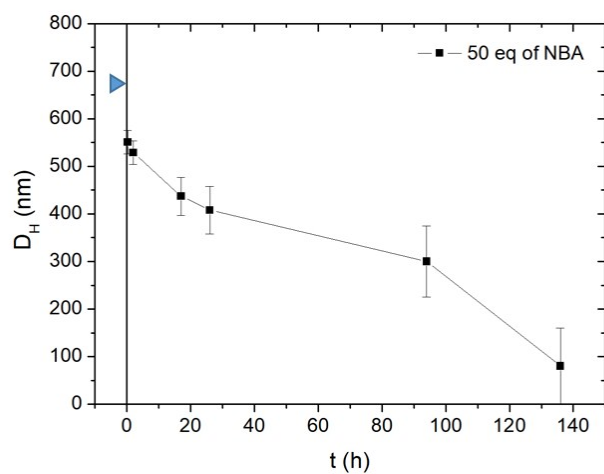

**Fig. S8.2** Evolution of hydrodynamic diameters ( $D_H$ ) measured by DLS as function of time for a mixture of  $(\text{LCu}_2)_n$  particles and NBA as  $[\text{LCu}_2] = 22 \mu\text{M}$  and  $[\text{NBA}] = 1.1 \text{ mM}$  (50 equivalents of NBA by  $\text{LCu}_2$  monomer) which has been irradiated by UV light (365 nm) for 2h.  $t = 0$  corresponds to the end of the 2 h of UV illumination. The blue triangle indicates the  $D_H$  of the particles before introduction of HCl.

## - 9. Depolymerization of $(LCu_2)_n$ particles triggered by addition of a competing chelator

Fig. S9.1.a shows that aqueous solution of EDTA at 3 mM and with pH adjusted to 7.2 does not absorb in the visible range (black curve) whereas  $CuCl_2$  solution at 2.31 mM strongly absorbs around  $\lambda_{max}(CuCl_2) = 807$  nm. Absorbance spectrum of  $Cu^{2+}$ -EDTA complexes, prepared by mixing  $CuCl_2$  and EDTA as  $n_{EDTA}/n_{CuCl_2} = 1.3$  and  $[EDTA] = 3$  mM and  $[CuCl_2] = 2.31$  mM, exhibits a peak at  $\lambda_{max}(Cu^{2+} - EDTA) = 732$  nm.

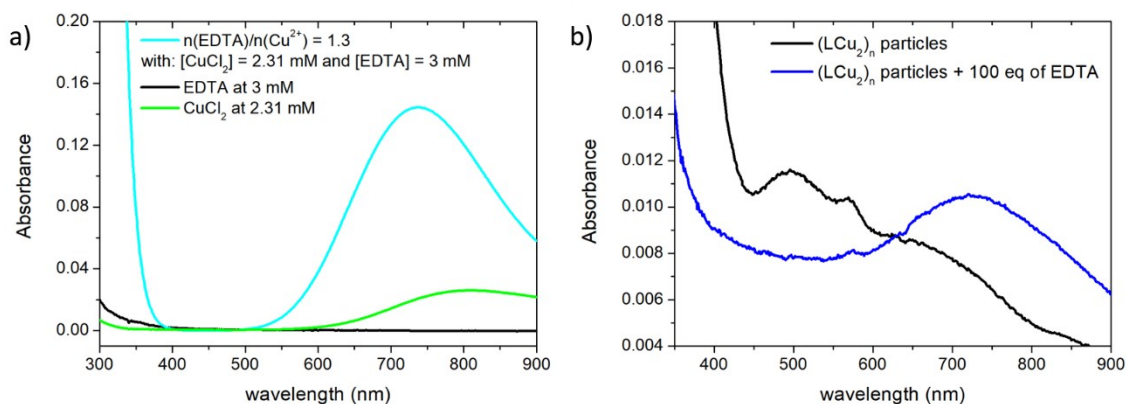

**Fig. S9.1 a)** UV-visible analysis of  $Cu^{2+}$ -EDTA complex. Absorbance spectra of an EDTA solution at  $[EDTA] = 3$  mM (black curve), a  $CuCl_2$  solution at  $[CuCl_2] = 2.31$  mM (green curve) with a maximum of absorbance at  $\lambda_{max}(CuCl_2) = 807$  nm, and a mixture of EDTA and  $CuCl_2$  with  $n_{EDTA}/n_{CuCl_2} = 1.3$ ,  $[EDTA] = 3$  mM and  $[CuCl_2] = 2.31$  mM (blue-green curve) with a maximum of absorbance at  $\lambda_{max}(Cu^{2+} - EDTA) = 732$  nm. Spectra were measured 24 h after preparation of the samples. **b)** Effect of addition of EDTA on  $(LCu_2)_n$  particles. UV-vis absorbance spectra of  $(LCu_2)_n$  particles at  $[LCu_2] = 36.7$   $\mu$ M (see part 3.3) (black curve), and of the same particles 260 h after addition of 100 equivalents of EDTA by  $LCu_2$  monomer units (blue curve). The spectrum corresponding to  $(LCu_2)_n$  particles and EDTA mixture (blue curve) exhibits an absorption band at 732 nm.

Fig. S9.2 shows pictures of concentrated  $(\text{LCu}_2)_n$  particles 48 h (Fig. S9.2.a) and 96 h (Fig. S9.2.b) after injection of 100 equivalents of EDTA by  $\text{LCu}_2$  monomer unit. 2.846 mL of EDTA solution at 0.27 M were added to 2 mL of  $(\text{LCu}_2)_n$  particles at  $[\text{LCu}_2] = 3.89$  mM (prepared as described in part 2.3), resulting in a pH = 7.2 mixture at  $[\text{LCu}_2] = 1.57$  mM and  $[\text{EDTA}] = 157.2$  mM (100 equivalents of EDTA by  $\text{LCu}_2$  monomer). The sample was incubated at 22°C.

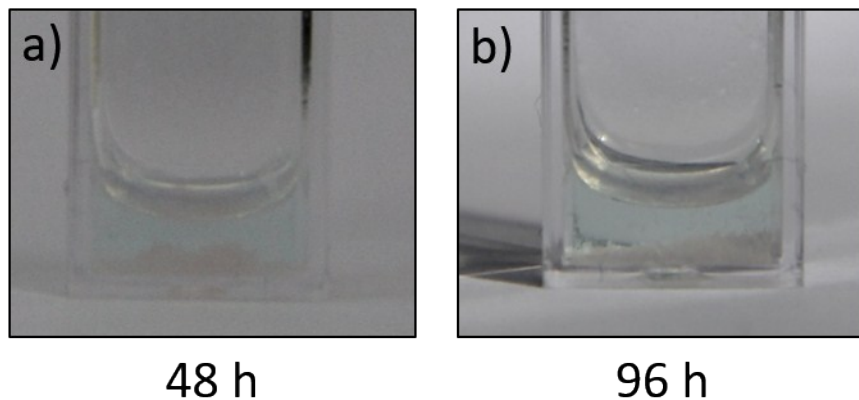

**Fig. S9.2** Pictures of  $(\text{LCu}_2)_n$  particles at  $[\text{LCu}_2] = 3.51$  mM mixed with 100 equivalents of EDTA by  $\text{LCu}_2$  monomer unit after 48 h (a) and 96 h (b) of incubation. Blue-green solutes reveal the presence of  $\text{Cu}^{2+}$ -EDTA complex. The slightly pink precipitate visible at  $t = 48$  h suggests the presence of  $\text{LCu}$  units, whereas the white one visible at  $t = 96$  h suggests that this solid matter is copper-free L ligand.

## - 10. References

- 1 A. Gasnier, J.-M. Barbe, C. Bucher, F. Denat, J.-C. Moutet, E. Saint-Aman, P. Terech and G. Royal, *Inorg. Chem.*, 2008, **47**, 1862-1864.
- 2 S. Abbruzzetti, M. Carcelli, D. Rogolino and C. Viappiani, *Photochem. Photobiol. Sci.*, 2003, **2**, 796-800.
- 3 P. Techawanitchai, M. Ebara, N. Idota and T. Aoyagi, *Colloids Surf. B*, 2012, **99**, 53-59.
- 4 P. Techawanitchai, M. Ebara, N. Idota, T.-A. Asoh, A. Kikuchi and T. Aoyagi, *Soft Matter*, 2012, **8**, 2844-2851.
